# Supplementary material
Source: MDPI journal article supplement (https://www.mdpi.com/2504-477X/7/4/150)
Supplement: s1 [file s1]

## Supplementary Information for:

# Effect of biobased SiO<sub>2</sub> on the morphological, thermal, mechanical, rheological and permeability properties of PLLA/PEG/SiO<sub>2</sub> biocomposites

Johanna Morales<sup>1,2</sup>, Rose Mary Michell<sup>1</sup>, Alicia Sommer<sup>1</sup> and Denis Rodrigue<sup>2\*</sup>

<sup>1</sup>School of Chemical Sciences and Engineering, Yachay Tech University, Urcuquí, 100119, Ecuador.

<sup>2</sup>Department of Chemical Engineering, Université Laval, Quebec, G1V 0A6, Canada.

\*[denis.rodrigue@gch.ulaval.ca](mailto:denis.rodrigue@gch.ulaval.ca)

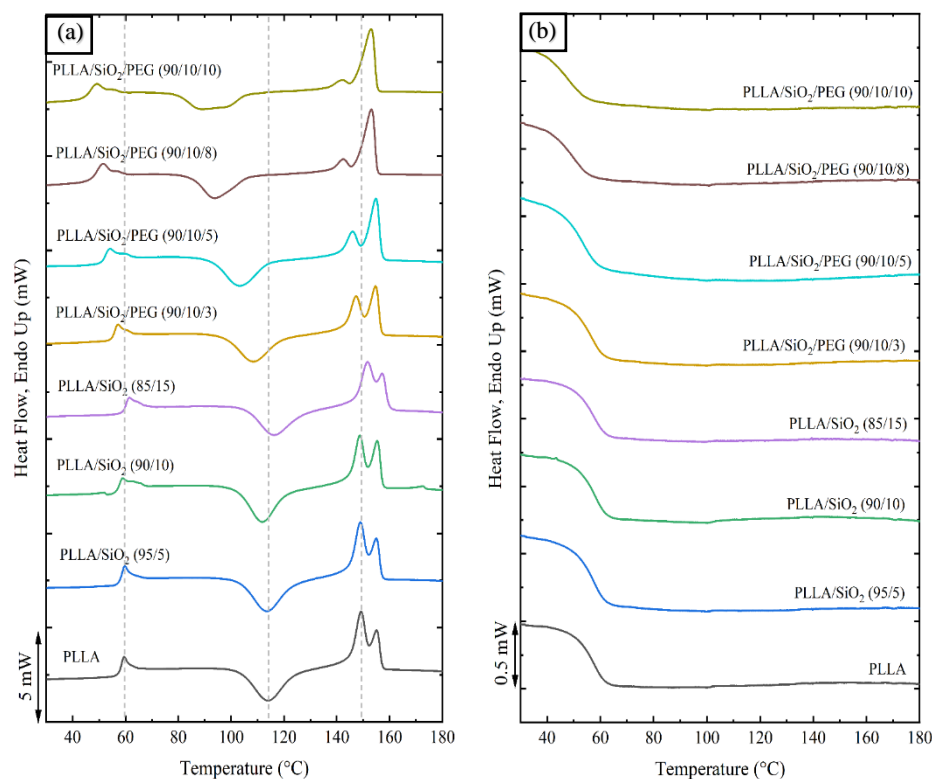

**Figure S1:** DSC thermograms of (a) first heating and (b) cooling step for PLLA, PLLA/SiO<sub>2</sub> and PLLA/SiO<sub>2</sub>/PEG composites.

**Table S1.** Avrami fitting parameters ( $n$ ,  $K$ , and  $\tau_{theo}^{1/2}$ ) and their correlation coefficient ( $R^2$ ). The experimental value of  $\tau^{1/2}$  is given for comparison purposes. The conversion range used was the same in each case (5–20%).

| Sample                                  | $T$<br>(°C) | $n$<br>(-) | $K$<br>(min <sup>-n</sup> ) | $\tau_{theo}^{1/2}$<br>(min) | $\tau_{exp}^{1/2}$<br>(min) | $R^2$  |
|-----------------------------------------|-------------|------------|-----------------------------|------------------------------|-----------------------------|--------|
| PLLA                                    | 91          | 3.27       | 3.42E-04                    | 10.3                         | 9.87                        | 0.9992 |
|                                         | 93          | 3.32       | 9.76E-04                    | 7.23                         | 7.20                        | 0.9999 |
|                                         | 95          | 3.68       | 8.32E-04                    | 6.22                         | 6.29                        | 1.0000 |
|                                         | 97          | 4.00       | 5.13E-04                    | 6.06                         | 6.18                        | 1.0000 |
|                                         | 100         | 3.68       | 7.75E-04                    | 6.14                         | 6.33                        | 1.0000 |
|                                         | 103         | 3.56       | 1.56E-03                    | 5.56                         | 5.76                        | 0.9999 |
| PLLA/SiO <sub>2</sub> (95/5)            | 90          | 3.61       | 1.34E-04                    | 10.7                         | 10.5                        | 0.9999 |
|                                         | 91          | 3.64       | 1.19E-04                    | 10.8                         | 10.6                        | 0.9996 |
|                                         | 93          | 3.77       | 1.87E-04                    | 8.83                         | 8.82                        | 0.9998 |
|                                         | 95          | 3.87       | 2.51E-04                    | 7.73                         | 7.81                        | 0.9999 |
|                                         | 97          | 3.78       | 5.05E-04                    | 6.76                         | 6.93                        | 1.0000 |
|                                         | 100         | 3.61       | 1.29E-03                    | 5.70                         | 5.87                        | 1.0000 |
| PLLA/SiO <sub>2</sub> (90/10)           | 95          | 3.75       | 3.21E-04                    | 7.76                         | 7.74                        | 0.9998 |
|                                         | 97          | 3.59       | 7.08E-04                    | 6.81                         | 6.76                        | 0.9997 |
|                                         | 100         | 3.45       | 2.05E-03                    | 5.41                         | 5.39                        | 0.9998 |
|                                         | 103         | 3.32       | 5.28E-03                    | 4.40                         | 4.36                        | 0.9998 |
|                                         | 105         | 3.32       | 4.86E-03                    | 4.46                         | 4.42                        | 0.9998 |
|                                         | 107         | 3.28       | 1.07E-02                    | 3.57                         | 3.53                        | 0.9998 |
| PLLA/SiO <sub>2</sub> (85/15)           | 91          | 4.16       | 8.18E-06                    | 15.3                         | 15.7                        | 1.0000 |
|                                         | 93          | 4.21       | 1.28E-05                    | 13.4                         | 14.0                        | 0.9999 |
|                                         | 95          | 3.74       | 7.17E-05                    | 11.6                         | 12.0                        | 1.0000 |
|                                         | 97          | 3.48       | 1.97E-04                    | 10.4                         | 10.7                        | 1.0000 |
|                                         | 100         | 3.24       | 7.10E-04                    | 8.37                         | 8.51                        | 1.0000 |
|                                         | 103         | 3.02       | 1.91E-03                    | 7.06                         | 7.11                        | 1.0000 |
| PLLA/SiO <sub>2</sub> /PEG<br>(90/10/3) | 95          | 3.60       | 1.26E-03                    | 5.77                         | 5.89                        | 1.0000 |
|                                         | 97          | 3.49       | 2.57E-03                    | 4.97                         | 5.24                        | 1.0000 |
|                                         | 100         | 3.37       | 7.34E-03                    | 3.86                         | 4.13                        | 1.0000 |
|                                         | 103         | 3.26       | 1.67E-02                    | 3.13                         | 3.37                        | 1.0000 |
|                                         | 105         | 3.23       | 2.47E-02                    | 2.81                         | 3.01                        | 1.0000 |
|                                         | 107         | 3.17       | 3.68E-02                    | 2.52                         | 2.69                        | 1.0000 |

|                                          |    |      |          |      |      |        |
|------------------------------------------|----|------|----------|------|------|--------|
| PLLA/SiO <sub>2</sub> /PEG<br>(90/10/5)  | 86 | 3.08 | 1.18E-03 | 7.90 | 7.63 | 0.9996 |
|                                          | 88 | 3.13 | 2.52E-03 | 6.02 | 5.80 | 0.9994 |
|                                          | 90 | 3.15 | 6.15E-03 | 4.48 | 4.29 | 0.9993 |
|                                          | 93 | 3.08 | 1.27E-02 | 3.66 | 3.54 | 0.9993 |
|                                          | 95 | 3.06 | 2.54E-02 | 2.95 | 2.85 | 0.9994 |
|                                          | 97 | 3.04 | 4.58E-02 | 2.44 | 2.37 | 0.9995 |
|                                          |    |      |          |      |      |        |
| PLLA/SiO <sub>2</sub> /PEG<br>(90/10/8)  | 84 | 3.06 | 3.30E-03 | 5.74 | 5.29 | 0.9990 |
|                                          | 86 | 3.15 | 5.87E-03 | 4.56 | 4.24 | 0.9990 |
|                                          | 88 | 3.21 | 1.19E-02 | 3.54 | 3.34 | 0.9992 |
|                                          | 90 | 3.19 | 2.55E-02 | 2.82 | 2.66 | 0.9992 |
|                                          | 91 | 3.24 | 3.59E-02 | 2.49 | 2.36 | 0.9994 |
|                                          | 95 | 2.98 | 1.43E-01 | 1.70 | 1.59 | 0.9991 |
|                                          |    |      |          |      |      |        |
| PLLA/SiO <sub>2</sub> /PEG<br>(90/10/10) | 78 | 3.04 | 6.80E-04 | 9.78 | 9.41 | 0.9993 |
|                                          | 80 | 3.05 | 1.52E-03 | 7.44 | 7.13 | 0.9991 |
|                                          | 82 | 3.16 | 2.78E-03 | 5.72 | 5.55 | 0.9995 |
|                                          | 84 | 3.20 | 5.78E-03 | 4.47 | 4.35 | 0.9996 |
|                                          | 86 | 3.24 | 1.30E-02 | 3.41 | 3.34 | 0.9998 |
|                                          | 88 | 3.30 | 2.64E-02 | 2.69 | 2.65 | 0.9998 |
|                                          |    |      |          |      |      |        |

---

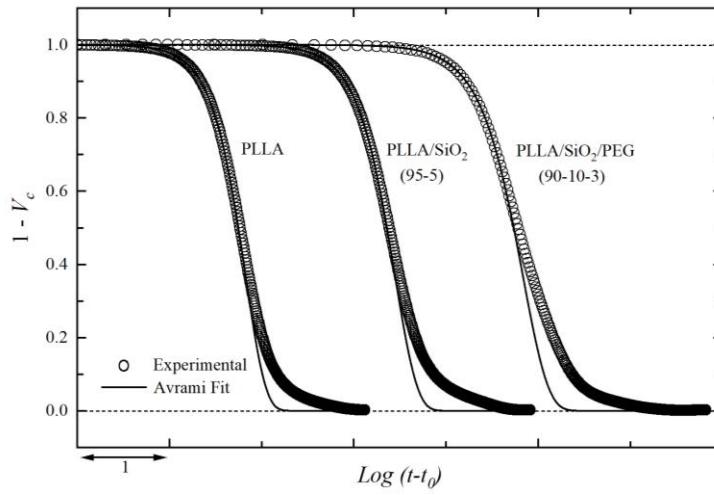

**Figure S2.** Variation of  $1 - V_c$  (volumetric relative amorphous content) as a function of  $\log(t - t_0)$ . The lines represent fitting to the Avrami model (Eq. 3) with the parameters of Table 6. The crystallization temperatures were 97, 100, and 107 °C for PLLA, PLLA/SiO<sub>2</sub> (95-5), and PLLA/SiO<sub>2</sub>/PEG (90-10-3), respectively.

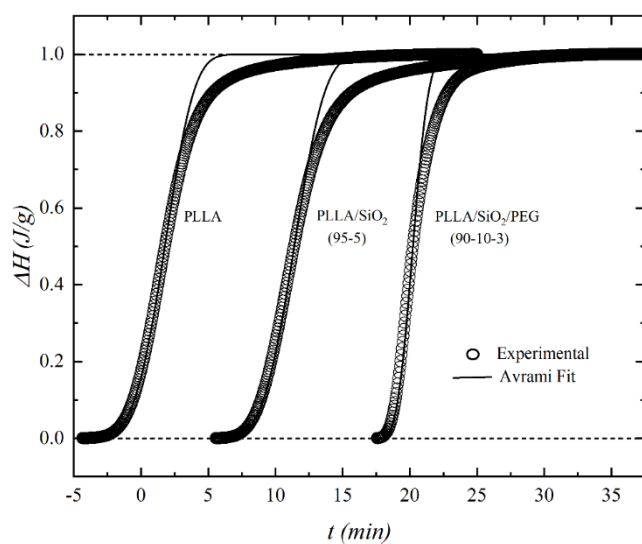

**Figure S3.** Variation of the enthalpy of crystallization ( $\Delta H_c$ ) as a function of time ( $t$ ) for PLLA, PLLA/SiO<sub>2</sub> (95-5), and PLLA/SiO<sub>2</sub>/PEG (90-10-3).

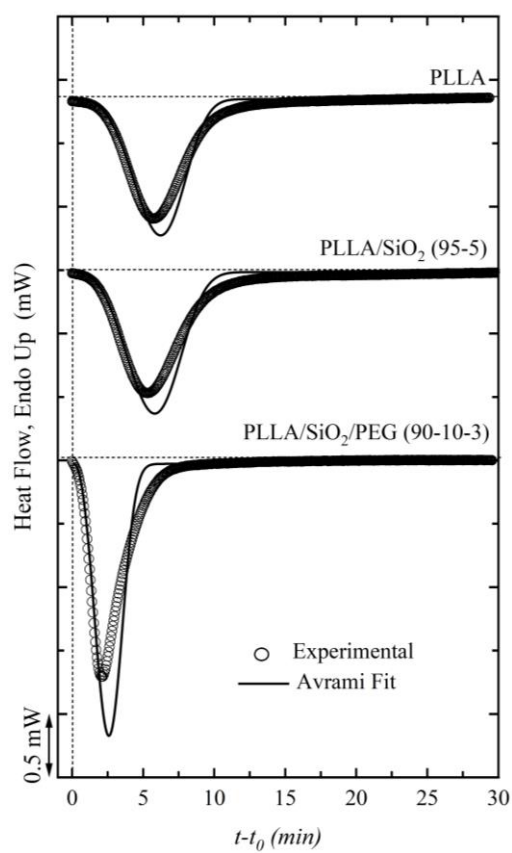

**Figure S4.** Experimental DSC isotherms and simulated DSC curves by the Avrami equation for PLLA, PLLA/SiO<sub>2</sub> (95-5), and PLLA/SiO<sub>2</sub>/PEG (90-10-3). The crystallization temperatures were 97, 100, and 107 °C for PLLA, PLLA/SiO<sub>2</sub> (95-5), and PLLA/SiO<sub>2</sub>/PEG (90-10-3), respectively.

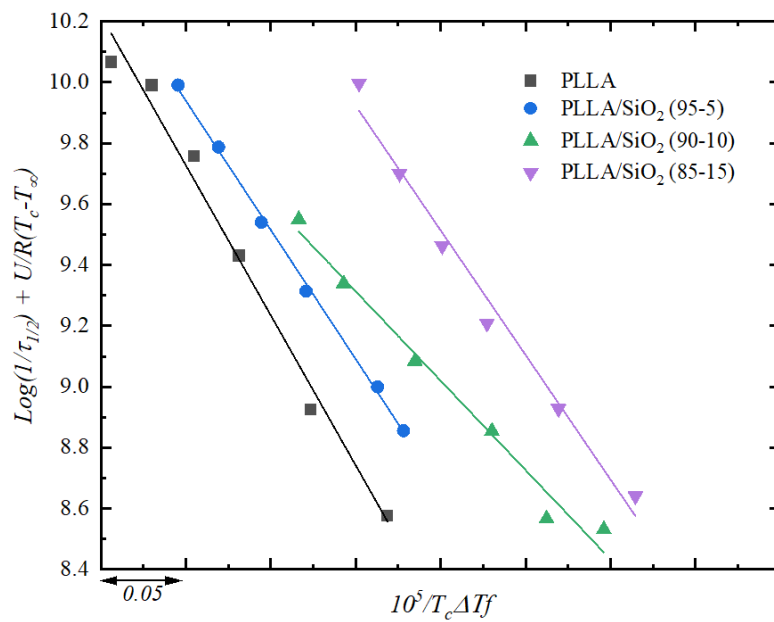

**Figure S5.** Plots of  $\ln(1/t_{1/2}) + U^*/R(T_c - T_\infty)$  as a function of  $(1/T_c \Delta T f)$  for PLLA, PLLA/SiO<sub>2</sub> (95-5), PLLA/SiO<sub>2</sub> (90-10), and PLLA/SiO<sub>2</sub> (85-15).

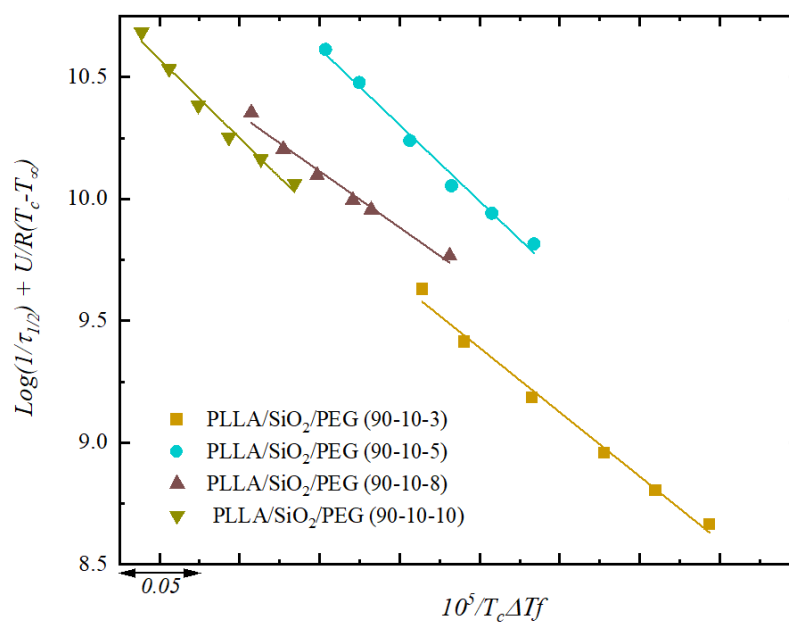

**Figure S6.** Plots of  $\ln(1/t_{1/2}) + U(*)/R(T_c - T_\infty)$  as a function of  $(1/T_c\Delta Tf)$  for PLLA/SiO<sub>2</sub>/PEG composites.
